# Supplementary material for: Characterization of Shigella sonnei in Malaysia, an increasingly prevalent etiologic agent of local shigellosis cases
Source: PubMed Central journal article supplement (PMC3420240; doi:10.1186/1471-2334-12-122), 2012-05-20
Supplement: 1471-2334-12-122-S1.pdf [file 1471-2334-12-122-S1.pdf]

**Additional file 1: Information on the 173 *S. sonnei* strains from five other countries**

| <b>Outbreaks (O)/<br/>Unrelated episodes<br/>(E)<sup>a,b</sup></b> | <b>Legend in<br/>Figure 3</b> | <b>Number of<br/>strain<sup>a,b</sup></b> | <b>Year<sup>a,b</sup></b> | <b>MLVA<br/>type<sup>b</sup></b> | <b>Global clonal<br/>group<sup>c</sup></b> |
|--------------------------------------------------------------------|-------------------------------|-------------------------------------------|---------------------------|----------------------------------|--------------------------------------------|
| O1                                                                 | O1                            | 7                                         | 1996                      | SS26.73                          | A                                          |
| O2                                                                 | O2                            | 9                                         | 1998                      | SS26.21                          | A                                          |
| O3                                                                 | O3_1                          | 6                                         | 1998                      | SS26.18                          | A                                          |
|                                                                    | O3_2                          | 2                                         | 1998                      | SS26.74                          | A                                          |
| O4                                                                 | O4_1                          | 5                                         | 1998                      | SS26.21                          | A                                          |
|                                                                    | O4_2                          | 1                                         | 1998                      | SS26.75                          | A                                          |
| O5                                                                 | O5_1                          | 3                                         | 2000                      | SS26.1                           | A                                          |
|                                                                    | O5_2                          | 3                                         | 2000                      | SS26.129                         | A                                          |
|                                                                    | O5_3                          | 43                                        | 2000                      | SS26.66                          | A                                          |
| O6                                                                 | O6_1                          | 1                                         | 2001                      | SS26.102                         | C                                          |
|                                                                    | O6_2                          | 16                                        | 2001                      | SS26.3                           | C                                          |
| O7                                                                 | O7_1                          | 22                                        | 2001                      | SS26.1                           | A                                          |
|                                                                    | O7_2                          | 2                                         | 2001                      | SS26.111                         | A                                          |
|                                                                    | O7_3                          | 2                                         | 2001                      | SS26.125                         | A                                          |
|                                                                    | O7_4                          | 1                                         | 2001                      | SS26.130                         | A                                          |
| O8                                                                 | O8                            | 6                                         | 2001                      | SS26.1                           | A                                          |
| O9                                                                 | O9_1                          | 7                                         | 2002                      | SS26.1                           | A                                          |
|                                                                    | O9_2                          | 6                                         | 2002                      | SS26.125                         | A                                          |
|                                                                    | O9_3                          | 1                                         | 2002                      | SS26.142                         | A                                          |
| O10                                                                | O10                           | 3                                         | 2003*                     | SS26.7                           | B                                          |
|                                                                    |                               | 5                                         | 2004*                     | SS26.7                           | B                                          |
| E1                                                                 | E1_1                          | 3                                         | 1998                      | SS26.18                          | A                                          |
|                                                                    | E1_2                          | 1                                         | 1998                      | SS26.74                          | A                                          |
| E2                                                                 | E2                            | 1                                         | 1999                      | SS26.61                          | A                                          |
| E3                                                                 | E3                            | 1                                         | 2004                      | SS26.58                          | A                                          |
| E4                                                                 | E4                            | 7                                         | 2003                      | SS26.23                          | A                                          |
| E5                                                                 | E5                            | 1                                         | 2004                      | SS26.54                          | A                                          |
| E6                                                                 | E6                            | 1                                         | 2004                      | SS26.70                          | A                                          |
| E7                                                                 | E7                            | 1                                         | 2004                      | SS26.69                          | A                                          |
| E8                                                                 | E8_1                          | 3                                         | 2004                      | SS26.17                          | A                                          |
|                                                                    | E8_2                          | 1                                         | 2004                      | SS26.68                          | A                                          |
| E9                                                                 | E9                            | 2                                         | 2005                      | SS26.59                          | A                                          |

a: Chiou *et al.* (2006)

b: Liang *et al.* (2007)

c: Filliol-Toutain *et al.* (2011)

\*: December, 2003 to January, 2004
